# Supplementary material
Source: Preprints.org preprint supplement (doi:10.20944/preprints202109.0315.v1)
Supplement: Supplementary file 1 [file supplementary]

**Supporting Information**

**Roles of Oxygen Vacancies of CeO2 and Mn-doped CeO2 with the same morphology in Benzene Catalytic Oxidation**

Min Yanga,⊥, Genli Shenb,⊥, Mi Liub, Ke Dengb, Yan Gongb, Zhen Wangb,*, Qi Wangb,*

a Department of Chemistry, School of Chemistry and Biological Engineering, University of Science and Technology Beijing, 100083, China;

b CAS Key Laboratory of Standardization and Measurement for Nanotechnology, CAS Center for Excellence in Nanaoscience, National Center for Nanoscience and Technology, Beijing 100190, China;

***Corresponding author.**

E-mail: wangzh@nanoctr.cn (Zhen Wang)

E-mail: wangq@nanoctr.cn (Qi Wang)







**Fig. S1** Electron paramagnetic resonance signals of DMPO-X (a): Ce-Mn-NF, (b): Ce-Mn-NC.


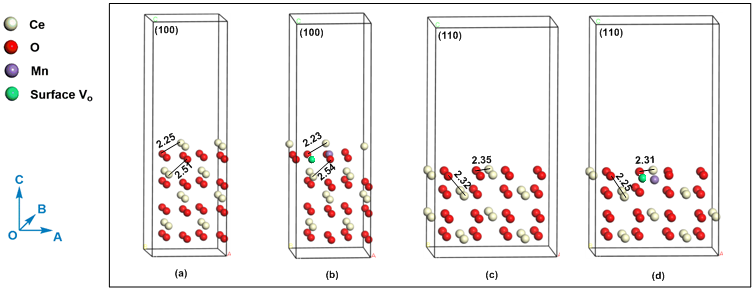


**Fig. S2** The distances of Ce-O on the surface and in bulk

(a): CeO2 (100) plane, (b) Mn-doped CeO2 (100) plane

(c): CeO2 (110) plane, (d) Mn-doped CeO2 (110) plane
